# Supplementary material for: Effects of pioglitazone therapy on blood parameters, weight and BMI: a meta-analysis
Source: PubMed Central journal article supplement (PMC5686837; doi:10.1186/s13098-017-0290-5), 2017-11-14
Supplement: 13098_2017_290_MOESM1_ESM.pdf [file 13098_2017_290_MOESM1_ESM.pdf]

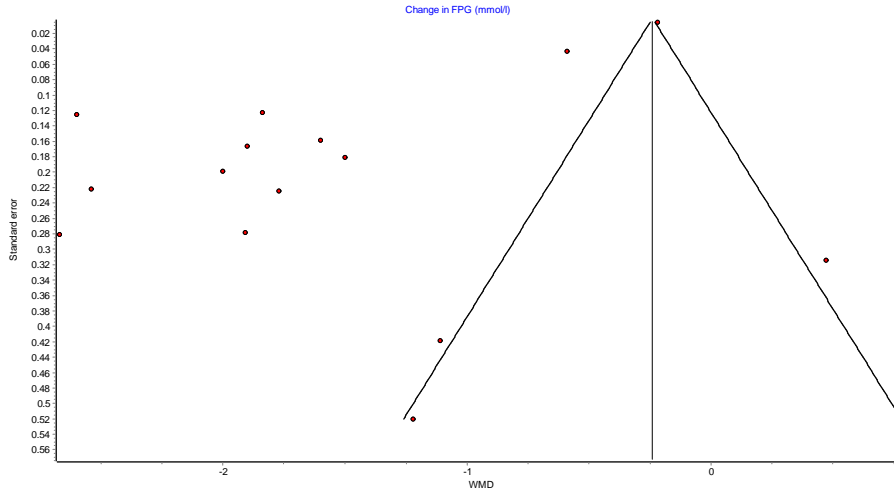

Figure S1 Funnel plot for FPG

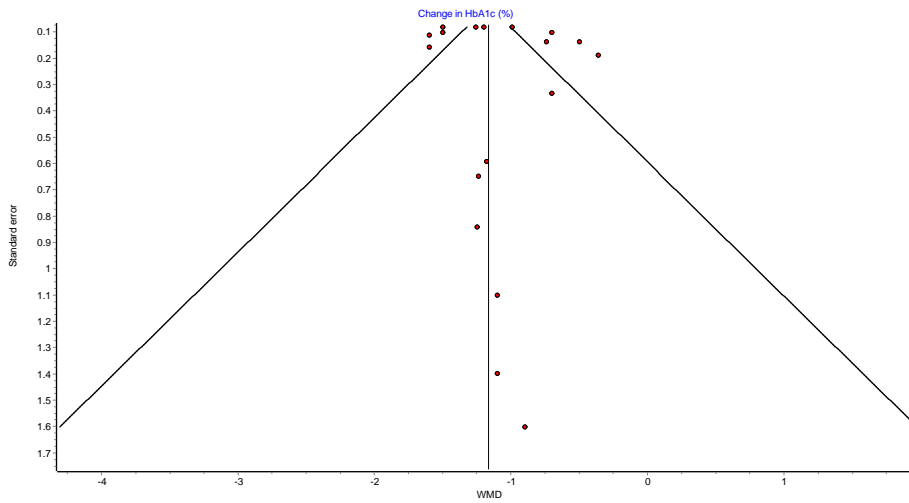

Figure S2 Funnel lot for HbA1c

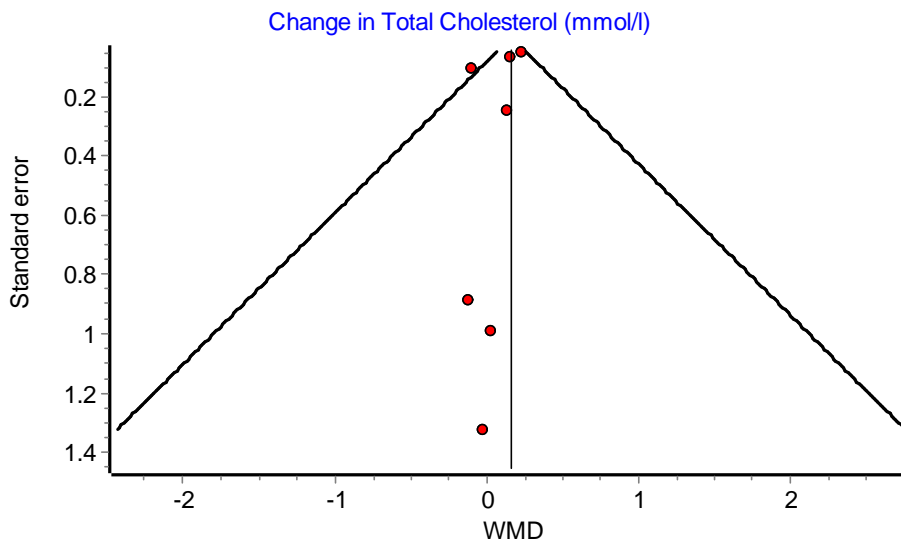

Figure S3 Funnel plot for total cholesterol

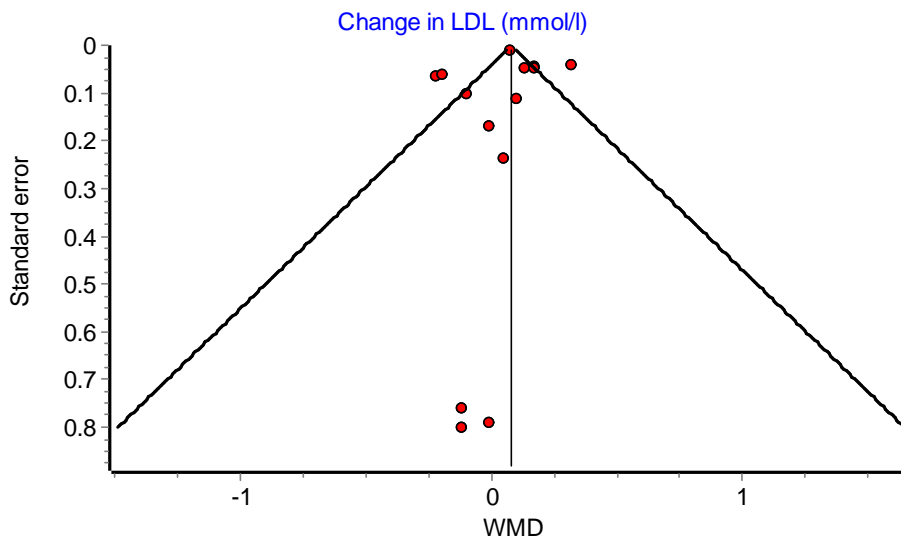

Figure S4 Funnel plot for LDL

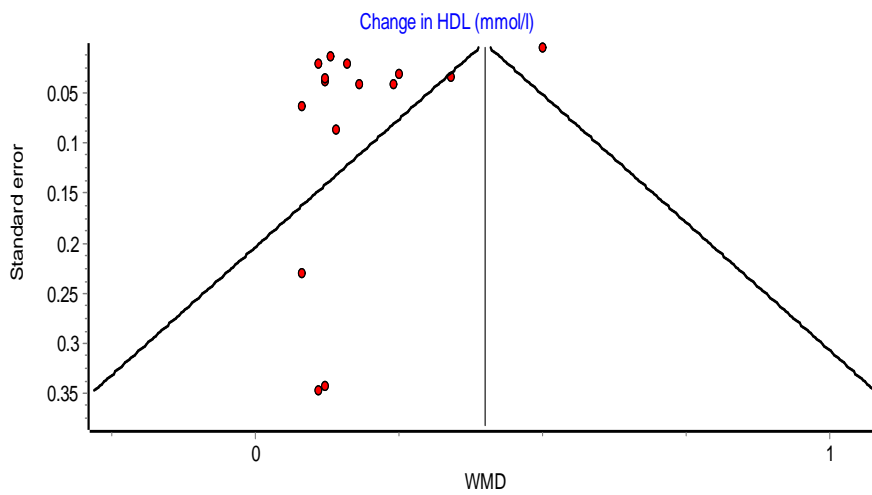

Figure S5 Funnel plot for HDL

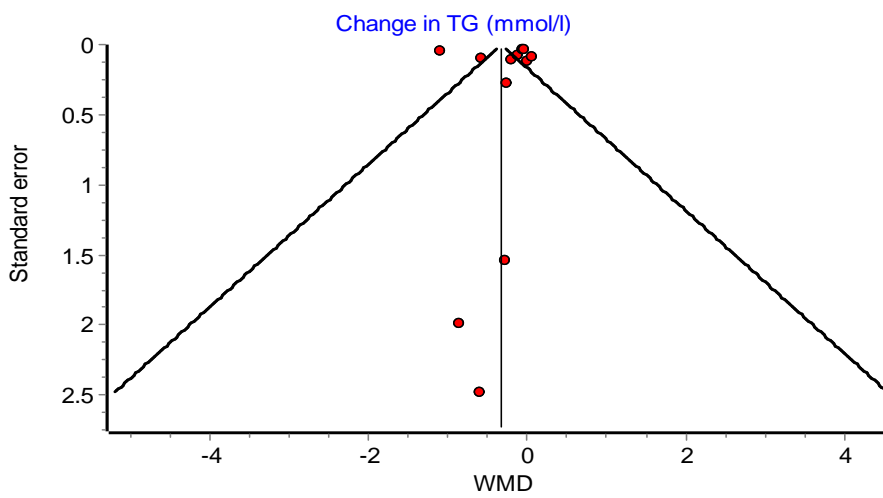

Figure S6 Funnel plot for TGs

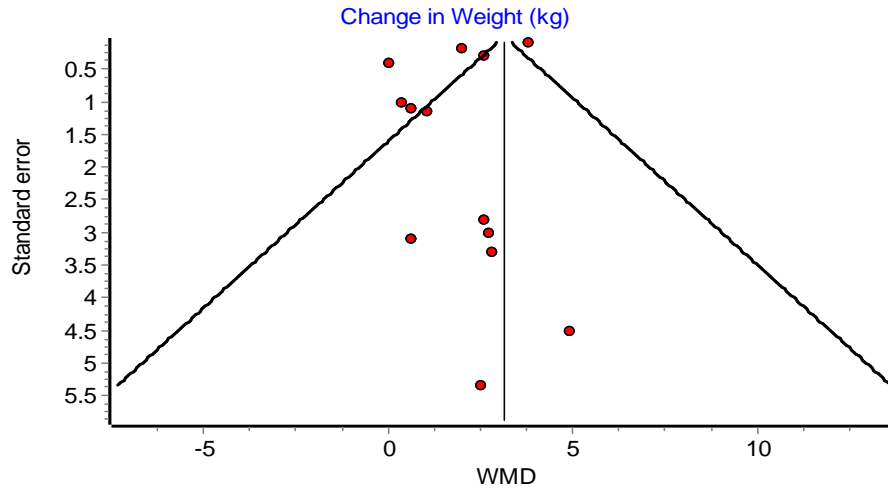

Figure S7 Funnel plot for weight

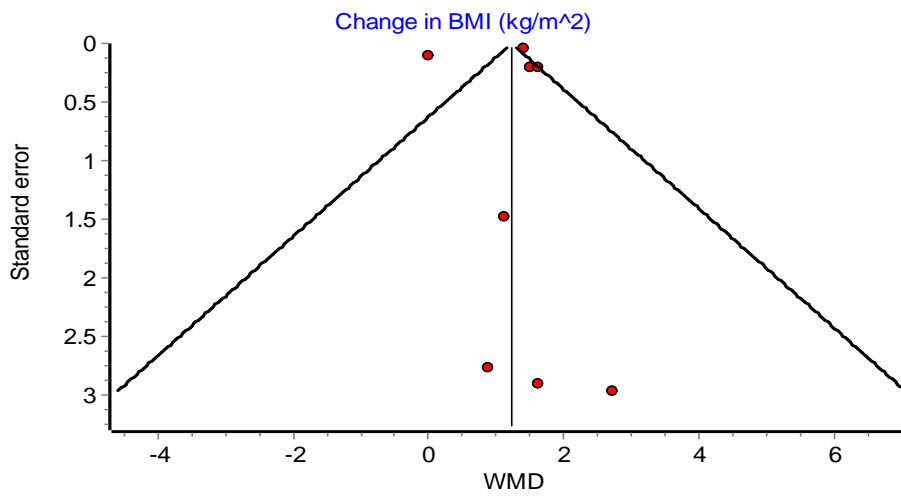

Figure S8 Funnel plot for BMI
